# 1 Identification of genetic markers for cortical areas using a Random 2 Forest classification routine and the Allen Mouse Brain Atlas

3  
4 Natalie Weed, Trygve Bakken, Nile Graddis, Nathan Gouwens,  
5 Daniel Millman, Michael Hawrylycz, Jack Waters\*

6  
7 Allen Institute for Brain Science

8 615 Westlake Ave N

9 Seattle WA 98109

10  
11  
12 \*email: [jackw@alleninstitute.org](mailto:jackw@alleninstitute.org).

## 13 14 Abstract

15 The mammalian neocortex is subdivided into a series of ‘cortical areas’ that are functionally and  
16 anatomically distinct, and are often distinguished in brain sections using histochemical stains and other  
17 markers of protein expression. We searched the Allen Mouse Brain Atlas, a database of gene expression,  
18 for novel markers of cortical areas. We employed a random forest algorithm to screen for genes that  
19 change expression at area borders. We found novel genetic markers for 19 of 39 areas and provide code  
20 that quickly and efficiently searches the Allen Mouse Brain Atlas.

## 21 Introduction

22 The mammalian neocortex is classified into a series of anatomically and functionally distinct regions or  
23 ‘cortical areas’ (Brodmann, 1909; Glasser *et al.*, 2016). Areas are often identified using histochemical  
24 stains and antibodies to visualize differences in protein expression across cortex. Examples include  
25 cytochrome oxidase histochemistry and antibodies against m2 muscarinic receptors (Wang, Sporns &  
26 Burkhalter, 2012). Furthermore, global expression signatures of cortical areas have been identified in  
27 human (Hawrylycz *et al.*, 2012), rhesus monkey (Bernard *et al.*, 2012) and mouse (Hawrylycz *et al.*,  
28 2010), but few genes have been identified with distinct transitions between adjacent areas. We  
29 reasoned that there may be genetic markers of cortical areas that have not been identified and that we  
30 might identify additional markers by screening the Allen Mouse Brain Atlas, a database containing in situ  
31 hybridization information for thousands of genes (Lein *et al.*, 2007). We developed numerical tools to  
32 screen the many thousands of images in the database, using a random forest algorithm to identify  
33 changes in gene expression at the boundaries of cortical areas defined in the Allen Mouse Brain  
34 Reference Atlas (Kuan *et al.*, 2015). We found novel genetic markers for several areas. In addition, we  
35 provide code that searches the Allen Mouse Brain Atlas quickly and efficiently for differences in gene  
36 expression between cortical areas. With only minor modification, our code could be adapted to search  
37 for genes that mark other brain regions, including subcortical nuclei.

38

## 39 Methods and Results

40 Our aim was to locate changes in gene expression between cortical regions in the mouse. From the Allen  
41 Mouse Brain Atlas, we took coronal in situ hybridization (ISH) data resampled to a canonical 3D  
42 reference space and overlaid the borders of cortical regions from the Allen Mouse Brain Reference Atlas.  
43 To identify genes with differential expression along these boundaries, we used a Random Forest  
44 algorithm.

45

### 46 Horizontal Projections

47 We obtained ISH data for 4345 genes from the Allen Mouse Brain Atlas ([brain-map.org/api/index.html](http://brain-map.org/api/index.html)).  
48 ISH data were of coronal sections (Figure 1A). However, the perspective that best captures most borders  
49 delineating cortical areas while eliminating excess information is the horizontal plane. To obtain a  
50 horizontal plane perspective from coronal sections, we created two projections for each gene: a ‘top  
51 projection’ and a ‘flat map projection’. Each projection was created in three steps, with the first two

52 steps being common to both projections. Firstly, we isolated cortical fluorescence and eliminated  
53 fluorescence from subcortical structures by applying a mask derived from the Allen SDK (2015)  
54 structure\_tree class (Figure 1B and C). Secondly, we created a maximum intensity surface projection: for  
55 each pixel on the cortical surface, we projected the fluorescence in the underlying tissue along a line  
56 perpendicular to the pial surface of cortex. One might think of this first step as creating a curved sheet  
57 of fluorescence intensity values at the surface of cortex. Finally, we projected these surface values to the  
58 horizontal plane, creating a top projection (Figure 1D) or we ‘unfurled’ the curved cortical sheet to  
59 create a flat map (Figure 1G). The flat map was particularly valuable in the study lateral cortical regions,  
60 which are under-represented in top projections.

61 All ISH data in the Allen Mouse Brain Atlas are spatially registered to the Allen Mouse Brain  
62 Reference Atlas ([http://help.brain-](http://help.brain-map.org/display/mousebrain/Documentation?preview=/2818169/8454277/MouseCCF.pdf)  
63 [map.org/display/mousebrain/Documentation?preview=/2818169/8454277/MouseCCF.pdf](http://help.brain-map.org/display/mousebrain/Documentation?preview=/2818169/8454277/MouseCCF.pdf)). Hence all  
64 data utilized are inherently co-aligned with the Allen Mouse Brain Reference Atlas and the locations of  
65 brain areas can be readily superimposed on the ISH results. To locate cortical regions in the top  
66 projection and create a cortical area map, we extracted the corresponding cortical area masks using the  
67 structure\_tree class and projected these masks to the horizontal plane, as described for ISH projections.  
68 Simplification of three-dimensional data into two dimensions allowed for fast quantitative analysis as  
69 well as easy visualization of expression patterns.

70

### 71 Random Forest Algorithm

72 When examining the ISH results, two limitations became apparent. Firstly, there are gaps in some data  
73 sets, with missing data manifest as dark pixels in coronal images or dark medial-lateral bands in the top  
74 projections (Figure 2A). Secondly, there is pronounced section-to-section variability in mean  
75 fluorescence that appears as coronal banding or ‘stripes’ in top projections (Figure 2B). Together these  
76 two effects often result in variation in pixel values, independent of variation due to differential gene  
77 expression. These data properties complicate the comparison of fluorescence along the anterior-  
78 posterior axis and, thereby, the comparison of expression between cortical regions. Rather than attempt  
79 to mitigate these issues directly, we trained a Random Forest algorithm to classify pixels as either inside  
80 or outside each cortical region, essentially learning the variance in the data.

81 We examined 39 cortical regions from the Allen Mouse Brain Reference Atlas for potential gene  
82 markers. Each search involved comparison of one cortical region to expression patterns of all genes,  
83 imputed as independent variables to the Random Forest algorithm. Random forest was implemented in

84 Python using the scikit-learn package (Pedregosa *et al.*, 2011). Nodes were determined by Gini Index  
85 criteria  $\sum_{k=1}^K (p_{mk} (1 - p_{mk}))$ . Each random forest consisted of 100 decision trees. Random state was  
86 initialized at 0. The importance of each variable was also determined by Gini Index criteria – reduction  
87 in Gini Index each time a split occurred was attributed to the variable, and that variable-associated  
88 reduction was divided by total reduction in Gini Index across the entire random forest to return the  
89 variable importance value. Total variable importance across all genes summed to one.

90 For each cortical region, three outputs from the random forest were produced and analyzed: (1) a  
91 confusion matrix, indicating the success rate of the classification algorithm; (2) the list of all 4345 genes,  
92 ranked in decreasing order of variable importance, where importance is a pseudo-measure of the  
93 expression predictive power across the cortical border; and (3) the importance values, one for each  
94 gene. The Random Forest was trained to distinguish pixels within a cortical region from pixels in the  
95 surrounding area outside of the cortical region. The inputs to the Random Forest algorithm were the  
96 gene expression fluorescence intensity values of all 4345 genes for each pixel and the corresponding  
97 labels for each pixel as cortical region or surrounding region. Surrounding pixels were identified by  
98 dilating the region mask by 30 iterations using SciPy ndimage package in Python, translating to roughly  
99 30 pixels in distance in each direction. Pixels were split into training and test sets, with 100 randomly  
100 selected pixels held out as a test set and the remaining pixels forming the training set. This represented  
101 less than 1% of total pixels classified for each cortical area. Data was divided using the scikit-learn  
102 model\_selection package in Python. Hence the training array input into the Random Forest algorithm  
103 consisted of a 2D array of dimensions 4345 by  $N - 100$ , where 4345 is the number of genes and  $N$  is the  
104 number of pixels within the dilated mask, and each cell in the array corresponding to a luminance value  
105 of the pixel. A second array of dimensions 1 by  $N - 100$  indicated the binary labels, inside or outside the  
106 cortical region (Figure 2D). After training, performance of the algorithm was tested on the held-out  
107 pixels (array dimensions 4345 by 100) for which the binary classification was withheld. Withheld pixels  
108 were randomly selected, creating a test set that was representative of the cortical area: balanced inside  
109 and outside the cortical region, and varying in distance from the cortical area boundary. Hence the  
110 algorithm returned the cross-validated binary classification for 100 withheld pixels, which was compared  
111 to known classification and used to plot a confusion matrix (Figure 2E), summarizing performance of the  
112 Random Forest. The displayed confusion matrix is averaged over all folds for the specified cortical  
113 region.

114 Results for primary somatosensory barrel field are illustrated in Figure 2E-G. The model correctly  
115 classified 52 of 54 test pixels within the barrel field and 44 of 46 test pixels outside barrel field, resulting

116 in a combined model accuracy of 96% (Figure 2E). Most genes exhibited low variable importance (Figure  
117 2F). We ranked genes by their random forest variable importance values. The gene with rank 1 exhibited  
118 a distinct change along the border (Figure 2G). The gene with rank 10 exhibited a subtler change and the  
119 gene at rank 100 exhibited no obvious change along the border (Figure 2G). Hence the Random Forest  
120 algorithm accurately classified most pixels and, via a ranked list of genes, identified a short list of genes  
121 that might act as putative genetic markers of the cortical region.

122

### 123 Genetic markers of cortical areas

124 To identify genetic markers for each cortical area, we manually inspected the top projections or flat  
125 maps for the top 10 genes, as determined by the Random Forest results. Adequate information for  
126 classification of barrel field was included in the 10 highest importance genes since running our analysis  
127 with only these 10 genes as inputs conserved prediction accuracy at 96%. Of the 45 cortical regions  
128 tested, we identified potential genetic markers for 19 (Table 1). 6 cortical areas were determined too  
129 small to reliably examine, resulting in 39 regions to explore. Of the six markers identified by Hawrylycz *et*  
130 *al.* (2010), three were extracted by our method (*Man1a*, somatomotor; *Rorb*, somatosensory; *Scnn1a*,  
131 ventral retrosplenial), one included an area that was not explored (*Smoc1*, gustatory), one was in a  
132 region where many other strong markers were identified (*Rreb1*, retrosplenial), and one was not  
133 identified (*Hap1*, ectohippocampal). Selected potential genetic markers indicated relatively high sensitivity for  
134 area marking, low specificity due to the point selection process, bilateral expression, and entire cortical  
135 area contrast.

136 Examples of expression patterns are provided in Figure 3. For primary somatosensory cortex barrel  
137 field, we identified *Rspo1* as a strong candidate gene (Figure 3A). Expression of *Rspo1* is relatively high in  
138 the barrel field, moderate through somatosensory areas, and low in motor cortex. There were multiple  
139 markers for motor cortex, including *Wnt7b* (Figure 3B), but we found no compelling markers for primary  
140 or secondary motor cortex. *Rorb* was also identified as a potential marker, specifically for primary  
141 sensory cortices (Figure 3C). This provided an additional positive control that our method was robust  
142 and effective, as *Rorb* is an established marker for primary sensory areas (Hawrylycz *et al.*, 2010; Zhuang  
143 *et al.*, 2017). *Cdh24* marked primary auditory cortex (Figure 3E). We found multiple genes that labeled  
144 all or subregions of retrosplenial cortex. For example, *Tmem215* marked dorsal retrosplenial cortex (and  
145 primary somatosensory cortex) and *Npsr1* marked all of retrosplenial cortex (Figure 3D, F). In flat maps,  
146 *Serpinf1* was identified as a marker of the frontal pole (Figure 3G) and temporal association cortex was  
147 marked by *Lifr* (Figure 3H). Notably, some of these genes exhibit mediolateral stripes in the top

148 projection, indicating that our method is robust to the missing data and expression-independent  
149 variability in signal.

150

### 151 Cellular Basis of Potential Genetic Markers

152 Our Random Forest searches, applied to ISH data, identified genes that marked cortical area borders,  
153 but provided no insight into the cellular basis of the genetic markers. Does, for example, a change in  
154 gene expression result from an abrupt change in the density of a cell type with unique gene expression;  
155 or might the border result from a change in gene expression by a cell type that straddles the border?  
156 Gene expression in primary visual cortex and anterior lateral motor cortex has been studied using single-  
157 cell RNA sequencing (Tasic *et al*, 2018). From this transcriptomic data set and associated analysis tools  
158 (<https://github.com/AllenInstitute/scrattch.vis>), we examined cell types that express the marker genes  
159 identified in this study by top view projections (Figure 4). Markers were expressed in many different cell  
160 types. Several genes (*Adcy8*, *Bmp3*, *Cacnb3*, *Npsr1*, *Vgf*, *Zmat4*) were expressed mostly in neurons and  
161 not non-neuronal cells, suggesting that the border-related change in expression of these genes was  
162 neuronal. Some genes were expressed mostly in a cell sub-population, suggesting that there is likely a  
163 border-related change in the density of these cells or of their expression of one gene. For example,  
164 *Rspo1*, *Serpinf1* and *Man1a* are expressed in layer 4 excitatory neurons, vascular and leptomenigeal  
165 cells (VLMC) and macrophages, respectively. Unsurprisingly, our results are consistent with changes in  
166 gene expression marking cortical areas arising from changes in cell density in some instances and from  
167 changes in gene expression within a cell population in other instances. Importantly, both instances  
168 appear to have been detected by our Random Forest analysis of ISH data.

169

## 170 Discussion

171 We used a Random Forest algorithm to identify a short list of potential gene markers from thousands of  
172 candidate genes, applying this approach to 39 cortical regions in the mouse. Our results identified 44  
173 putative markers, marking 19 of the explored regions.

174 The spatial resolution and number of genes in the database places limits on the conclusions we can  
175 draw. Firstly, the voxel size of the ISH quantification in the database is 200  $\mu\text{m}$ . Once missing and  
176 variable data is considered, the maximum accuracy we can hope to achieve is on the order of hundreds  
177 of micrometers, resulting in an imperfect match between area borders and gene expression.

178 Subsequent experiments such as immunostaining for the genes we have identified would be necessary  
179 to confirm our results and to assess the accuracy with which each gene marks borders. Furthermore, the

180 database includes coronal ISH images for 4345 genes. It may be that genes not sampled here mark some  
181 of the 25 cortical regions for which we were unable to identify markers. Repeating our analysis on a  
182 larger data set, should one become available, might identify further markers.

183 Alternative methods include gene identification by direct comparison of expression difference along  
184 the cortical border. However, pooling of more pixels than those available solely along borders was  
185 necessary to overcome high luminance variability across pixels and coronal sections. For this reason, and  
186 the difficulty of direct quantification of variance in our data set, we decided to pursue random forest  
187 classification as our selected model. Variable importance may be inaccurately skewed towards higher  
188 sampled variables or continuous data types, and thus unusable; however, because our predictor  
189 variables exhibit identical scale of measurement and data type, importance rank can be taken as  
190 unbiased (Strobl *et al.*, 2007). Random forest uses a bootstrapped subset of variables at each splitting  
191 node when building decision trees. By accumulating many splits on previously subdivided pixels, genes  
192 are evaluated at subregions of the cortical area. Given this property, we find that occasionally genes  
193 with relatively high variable importance display marking of a single border rather than the entire cortical  
194 area. However, if a gene exhibits clear marking of all cortical borders, it is shown with higher variable  
195 importance than an alternate gene expression pattern marking only a single border. Random forest is an  
196 accurate, computationally efficient, and easily interpretable method of classification. This was important  
197 as many of our data sets, especially for larger cortical areas like somatosensory areas, reached sizes of  
198 almost 250,000 pixels, evaluated at 4345 genes. Each output predicted took less than a minute to  
199 compile the data set, run computations, and produce outputs on a desktop computer. By maximizing  
200 concurrent computation across all available cores, the time required to run is minimized while not  
201 sacrificing predictive power of our model, as exhibited by the high accuracy of the random forest.

202 By dilating the cortical area mask a small amount instead of comparing the area of interest to the  
203 entire cortex, we allowed for differential expression of the gene in more distant parts of cortex. This is  
204 by design, as expression far from the desired cortical region does not impact the ability of the gene to  
205 mark the border. However, potential uniquely expressed genes are still a subset of those that can be  
206 identified with our method, and our method could be readily modified to solely identify uniquely  
207 expressed genes. Similarly, the method could be easily extended to investigate laminar differences or  
208 expression patterns in subcortical structures as masks for cortical layers and for subcortical structures  
209 are included in the Allen Mouse Brain Reference Atlas.

## 210 References

- 211 Bernard A, Lubbers LS, Tanis KQ, Luo R, Podtelezchnikov AA, Finney EM, McWhorter MM, Serikawa K,  
212 Lemon T, Morgan R, Copeland C, Smith K, Cullen V, Davis-Turak J, Lee CK, Sunkin SM, Loboda AP,  
213 Levine DM, Stone DJ, Hawrylycz MJ, Roberts CJ, Jones AR, Geschwind DH, Lein ES (2012)  
214 Transcriptional architecture of the primate neocortex. *Neuron* 73(6), 1083-1099.
- 215 Brodmann K (1909). *Vergleichende Lokalisationslehre der Grosshirnrinde in ihren Prinzipien dargestellt*  
216 *auf Grund des Zellenbaues*. Leipzig: Barth JA.
- 217 Glasser MF, Coalson TS, Robinson EC, Hacker CD, Harwell J, Yacoub E, Ugurbil K, Andersson J, Beckmann  
218 CF, Jenkinson M, Smith SM, Van Essen DC (2016) A multi-modal parcellation of human cerebral  
219 cortex. *Nature* 536, 171-178.
- 220 Hawrylycz MJ, Lein ES, Guillozet-Bongaarts AL, Shen EH, Ng L, Miller JA, van de Lagemaat LN, Smith KA,  
221 Ebbert A, Riley ZL, Abajian C, Beckmann CF, Bernard A, Bertagnolli D, Boe AF, Cartagena PM,  
222 Chakravarty MM, Chapin M, Chong J, Dalley RA, Daly BD, Dang C, Datta S, Dee N, Dolbeare TA, Faber  
223 V, Feng D, Fowler DR, Goldy J, Gregor BW, Haradon Z, Haynor DR, Hohmann JG, Horvath S, Howard  
224 RE, Jeromin A, Jochim JM, Kinnunen M, Lau C, Lazarz ET, Lee C, Lemon TA, Li L, Li Y, Morris JA, Overly  
225 CC, Parker PD, Parry SE, Reding M, Royall JJ, Schulkin J, Sequeira PD, Slaughterbeck CR, Smith SC,  
226 Sodt AJ, Sunkin SM, Swanson BE, Vawter MP, Williams D, Wohnoutka P, Zielke HR, Geschwind DH,  
227 Hof PR, Smith SM, Koch C, Grant SGN, Jones AR (2012) An anatomically comprehensive atlas of the  
228 adult human brain transcriptome. *Nature* 489, 391-399.
- 229 Hawrylycz MJ, Bernard A, Lau C, Sunkin SM, Chakravarty MM, Lein ES, Jones AR, Ng L (2010) Areal  
230 and laminar differentiation in the mouse neocortex using large scale gene expression data.  
231 *Methods* 50(2), 113-121.
- 232 Kuan L, Li Y, Lau C, Feng D, Bernard A, Sunkin SM, Zeng H, Dang C, Hawrylycz M, Ng L, Li Y LC (2015)  
233 Neuroinformatics of the Allen Mouse Brain Connectivity Atlas. *Methods* 73, 4–17.
- 234 Lein, E.S, Hawrylycz MJ, Ao N, Ayres M, Bensinger A, Bernard A, Boe AF, Boguski MS, Brockway KS,  
235 Byrnes EJ, Chen L, Chen L, Chen TM, Chin MC, Chong J, Crook BE, Czaplinska, A, Dang CN, Datta S,  
236 Dee NR, Desaki AL, Desta T, Diep E, Dolbeare TA, Donelan MJ, Dong HW, Dougherty JG, Duncan BJ,  
237 Ebbert AJ, Eichele G, Estin LK, Faber C, Facer BA, Fields R, Rischer SR, Fliss TP, Frensley C, Gates SN,  
238 Glattfelder KJ, Halverson KR, Hart MR, Hohmann JG, Howell MP, Jeung DP, Johnson RA, Karr PT,  
239 Kawal R, Kidney JM, Knapik RH, Kuan CL, Lake JH, Laramée AR, Larsen KD, Lau C, Lemon TA, Liang AJ,  
240 Liu Y, Luong LT, Michaels J, Morgan JJ, Morgan RJ, Mortrud MT, Mosqueda NF, Ng LL, Ng R, Orta GJ,  
241 Overly CC, Pak TH, Parry SE, Pathak SD, Pearson OC, Puchalski RB, Riley ZL, Rockett HR, Rowland SA,



242 Royall JJ, Ruiz MJ, Sarno NR, Schaffnit K, Shapovalova NV, Sivasay T, Slaughterbeck CR, Smith SC,  
243 Smith KA, Smith BI, Sodt AJ, Stewart NN, Stumpf KR, SUnkin SM, Sutram M, Tam A, Temmer CD,  
244 Thaller C, Thompson CL, Varnam LR, Visel A, Whitlock RM, Wohnoutka PE, Wolkey CK, Wong VY,  
245 Wood M, Yaylaoglu MB, Young RC, Youngstrom BL, Yuan XF, Zhang B, Zwingman TA, Jones AR (2007)  
246 Genome-wide atlas of gene expression in the adult mouse brain. *Nature* 445, 168-176.

247 Pedregosa F, Varoquaux G, Gramfort A, Michel V, Thirion B, Grisel O, Blondel M, Prettenhofer P, Weiss  
248 R, Dubourg V, Vanderplas J, Passos A, Cournapeau D, Brucher M, Perrot M, Duchesnay E (2011)  
249 Scikit-learn: Machine Learning in Python. *JMLR* 12, 2825-2830.

250 Strobl C, Boulestin AL, Zeileis A, Hothorn T (2007) Bias in random forest variable importance measures:  
251 Illustrations, sources and a solution. *BMC Bioinformatics* 8, 25.

252 Tasic B, Yao Z, Graybiack LT, Smith KA, Nguyen TN, Bertagnolli D, Goldy J, Garren E, Economo MN,  
253 Viswanathan S, Osnat P, Bakken T, Menon V, Miller J, Fong O, Hirokawa KE, Lathia K, Rimorin C, Tieu  
254 M, Larsen R, Casper T, Barkan E, Kroll M, Parry S, Shapovalova NV, Hirschstein D, Pendergraft J,  
255 Sullivan HA, Kim TK, Szafer A, Dee N, Groblewski P, Wickersham I, Cetin A, Harris JA, Levi BP, Sunkin  
256 SM, Madisen L, Daigle TL, Looger L, Bernard A, Phillips J, Lein E, Hawrylycz M, Svoboda K, Jones AR,  
257 Koch C, Zeng H (2018) Shared and distinct transcriptomic cell types across neocortical areas. *Nature*  
258 563, 72-28.

259 Wang Q, Sporns O, Burkhalter A (2012) Network analysis for corticocortical connections reveals ventral  
260 and dorsal processing streams in mouse visual cortex. *J Neurosci* 32(13), 4386-4399.

261 Zhuang J, Ng L, Williams D, Valley M, Li Y, Garrett M, Waters J (2017) An extended retinotopic map of  
262 mouse cortex. *eLife* 6, e18372.

263  
264

## 265 Acknowledgements

266 We thank the Allen Institute founder, Paul G. Allen, for his vision, encouragement and support.

## 267 Figure Legends

### 268 **Figure 1. Creation of top projections from coronal images of gene expression.**

269 (A) Image of a coronal section from the Allen Mouse Brain Atlas. Gene: *Rorb*. ISH intensity is normalized  
270 to a range of 0 to 1. Color scale shown in panel C. (B) Binary cortex mask with value = 1 for cortical pixels  
271 and value = 0 for subcortical pixels. (C) Product of the images in A and B, resulting in ISH intensity values  
272 in cortical pixels and zero's in subcortical locations. (D) Schematic illustration of the projection process  
273 used to generate top projections. (E) Top projection for *Rorb*. Dashed line indicates location of section in  
274 panel A. (F) Cortical boundaries from the Allen Mouse Brain Reference Atlas, overlaid onto the gene  
275 expression top view of panel E. (G) Schematic illustration of the projection process used to generate flat  
276 map top projections. (H) Flat map projection for *Rorb*. Dashed line indicates location of section in panel  
277 A. (I) Cortical boundaries from the Allen Mouse Brain Reference Atlas, overlaid onto the gene expression  
278 top view of panel H.

279

### 280 **Figure 2. Random forest algorithm: method and example results.**

281 (A) A coronal image (left) and the top projection (right) for gene *Nvl*. Note the missing data (black  
282 pixels). (B) Top view for gene *Adra1d*. Note the pronounced variation in density along the a-p axis. (C)  
283 Binary mask for primary somatosensory cortex barrel field (SSp-bfd). Light gray inside SSp-bfd; darker  
284 grey marks pixels in surrounding region. White lines: boundaries of cortical areas in Allen Mouse Brain  
285 Reference Atlas. (D) Schematic illustration of arrays input into Random Forest algorithm. Columns  
286 correspond to gene, rows to pixels in the top projection data set. Each value is an ISH luminance value.  
287 Classification of pixel is taken from the reference mask (panel C). (E) Confusion matrix output from  
288 Random Forest algorithm for SSp-bfd. 0 indicates point outside SSp-bfd, 1 indicates point inside SSp-bfd.  
289 (F) Gene importance histogram. Importance values approximate a logarithmic distribution. (G) Examples  
290 of genes that mark SSp-bfd, with overlaid Allen Mouse Brain Reference Atlas borders. *Nov* rank 1,  
291 importance 0.022. *Hlf* rank 10, importance value 0.0081. *Stap2* rank 100, importance 0.0018.

292

### 293 **Figure 3. Examples of markers for cortical areas.**

294 (A) R-Spondin 1 labels primary somatosensory cortex barrel field. (B) Wnt Family Member 7B labels  
295 primary motor cortex. (C) Retinoid-Related Orphan Receptor, Beta labels primary sensory areas. (D)  
296 Transmembrane Protein 215 labels dorsal retrosplenial cortex. (E) Cadherin 24 labels primary auditory  
297 cortex. (F) Neuropeptide S Receptor 1 labels retrosplenial cortex. (G) Serpin Family F Member 1 labels  
298 frontal pole. (H) Leukemia Inhibitory Factor Receptor labels temporal association cortex. Panels A-F

299 provide examples of genes identified in top projections, panels G and H of genes identified in flat maps.  
300 Cortical areas of interest are marked with cyan borders.

301

#### 302 **Figure 4. Single Cell RNA-sequencing expression plot**

303 Log-transformed average expression of top-projection identified potential areal marker genes in mouse  
304 cortical cells grouped into subtypes of three major cell classes: inhibitory neurons, excitatory neurons,  
305 and non-neuronal cells. Expression data was measured by RNA-sequencing of single cells isolated from  
306 Primary Visual Cortex (VISp) and Anterior Lateral Motor Cortex (ALM). Color corresponds to expression  
307 value, with warmer colors indicating high expression and cooler colors indicating low expression. Max  
308 value indicates the maximum expression per gene, measured in average CPM per cluster. CPM = counts  
309 per million reads.

310

#### 311 **Table 1. List of Potential Genetic Markers**

312 Potential cortical boundary genetic markers, listed by cortical region, as identified by Random Forest  
313 variable importance classifier. All explored regions listed. Regions with no listed genes displayed no clear  
314 potential genetic marker. Each gene was identified independently. Asterisks indicate regions explored  
315 and genes identified with flat map projections.

figure 1

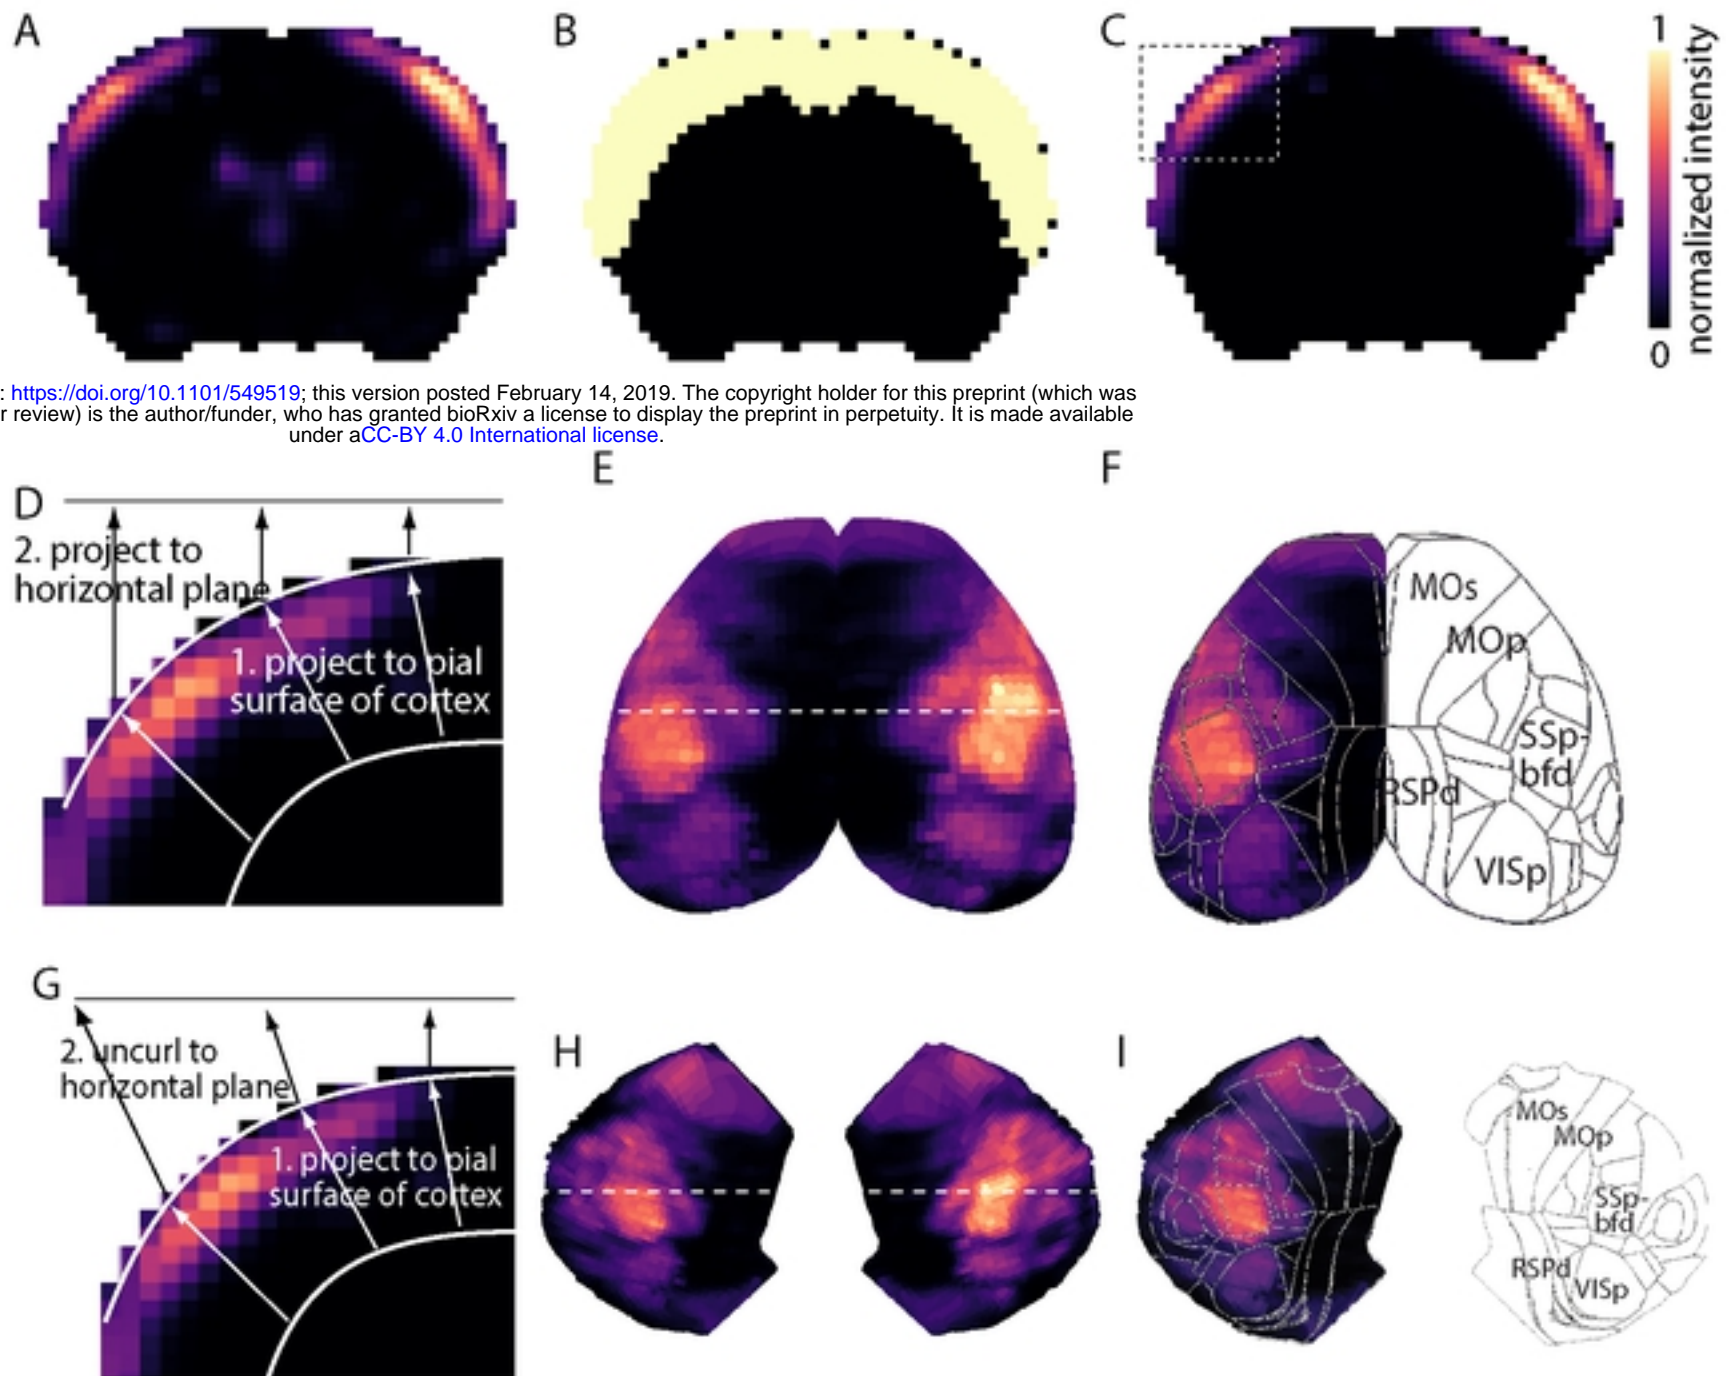

Figure 1

figure 4

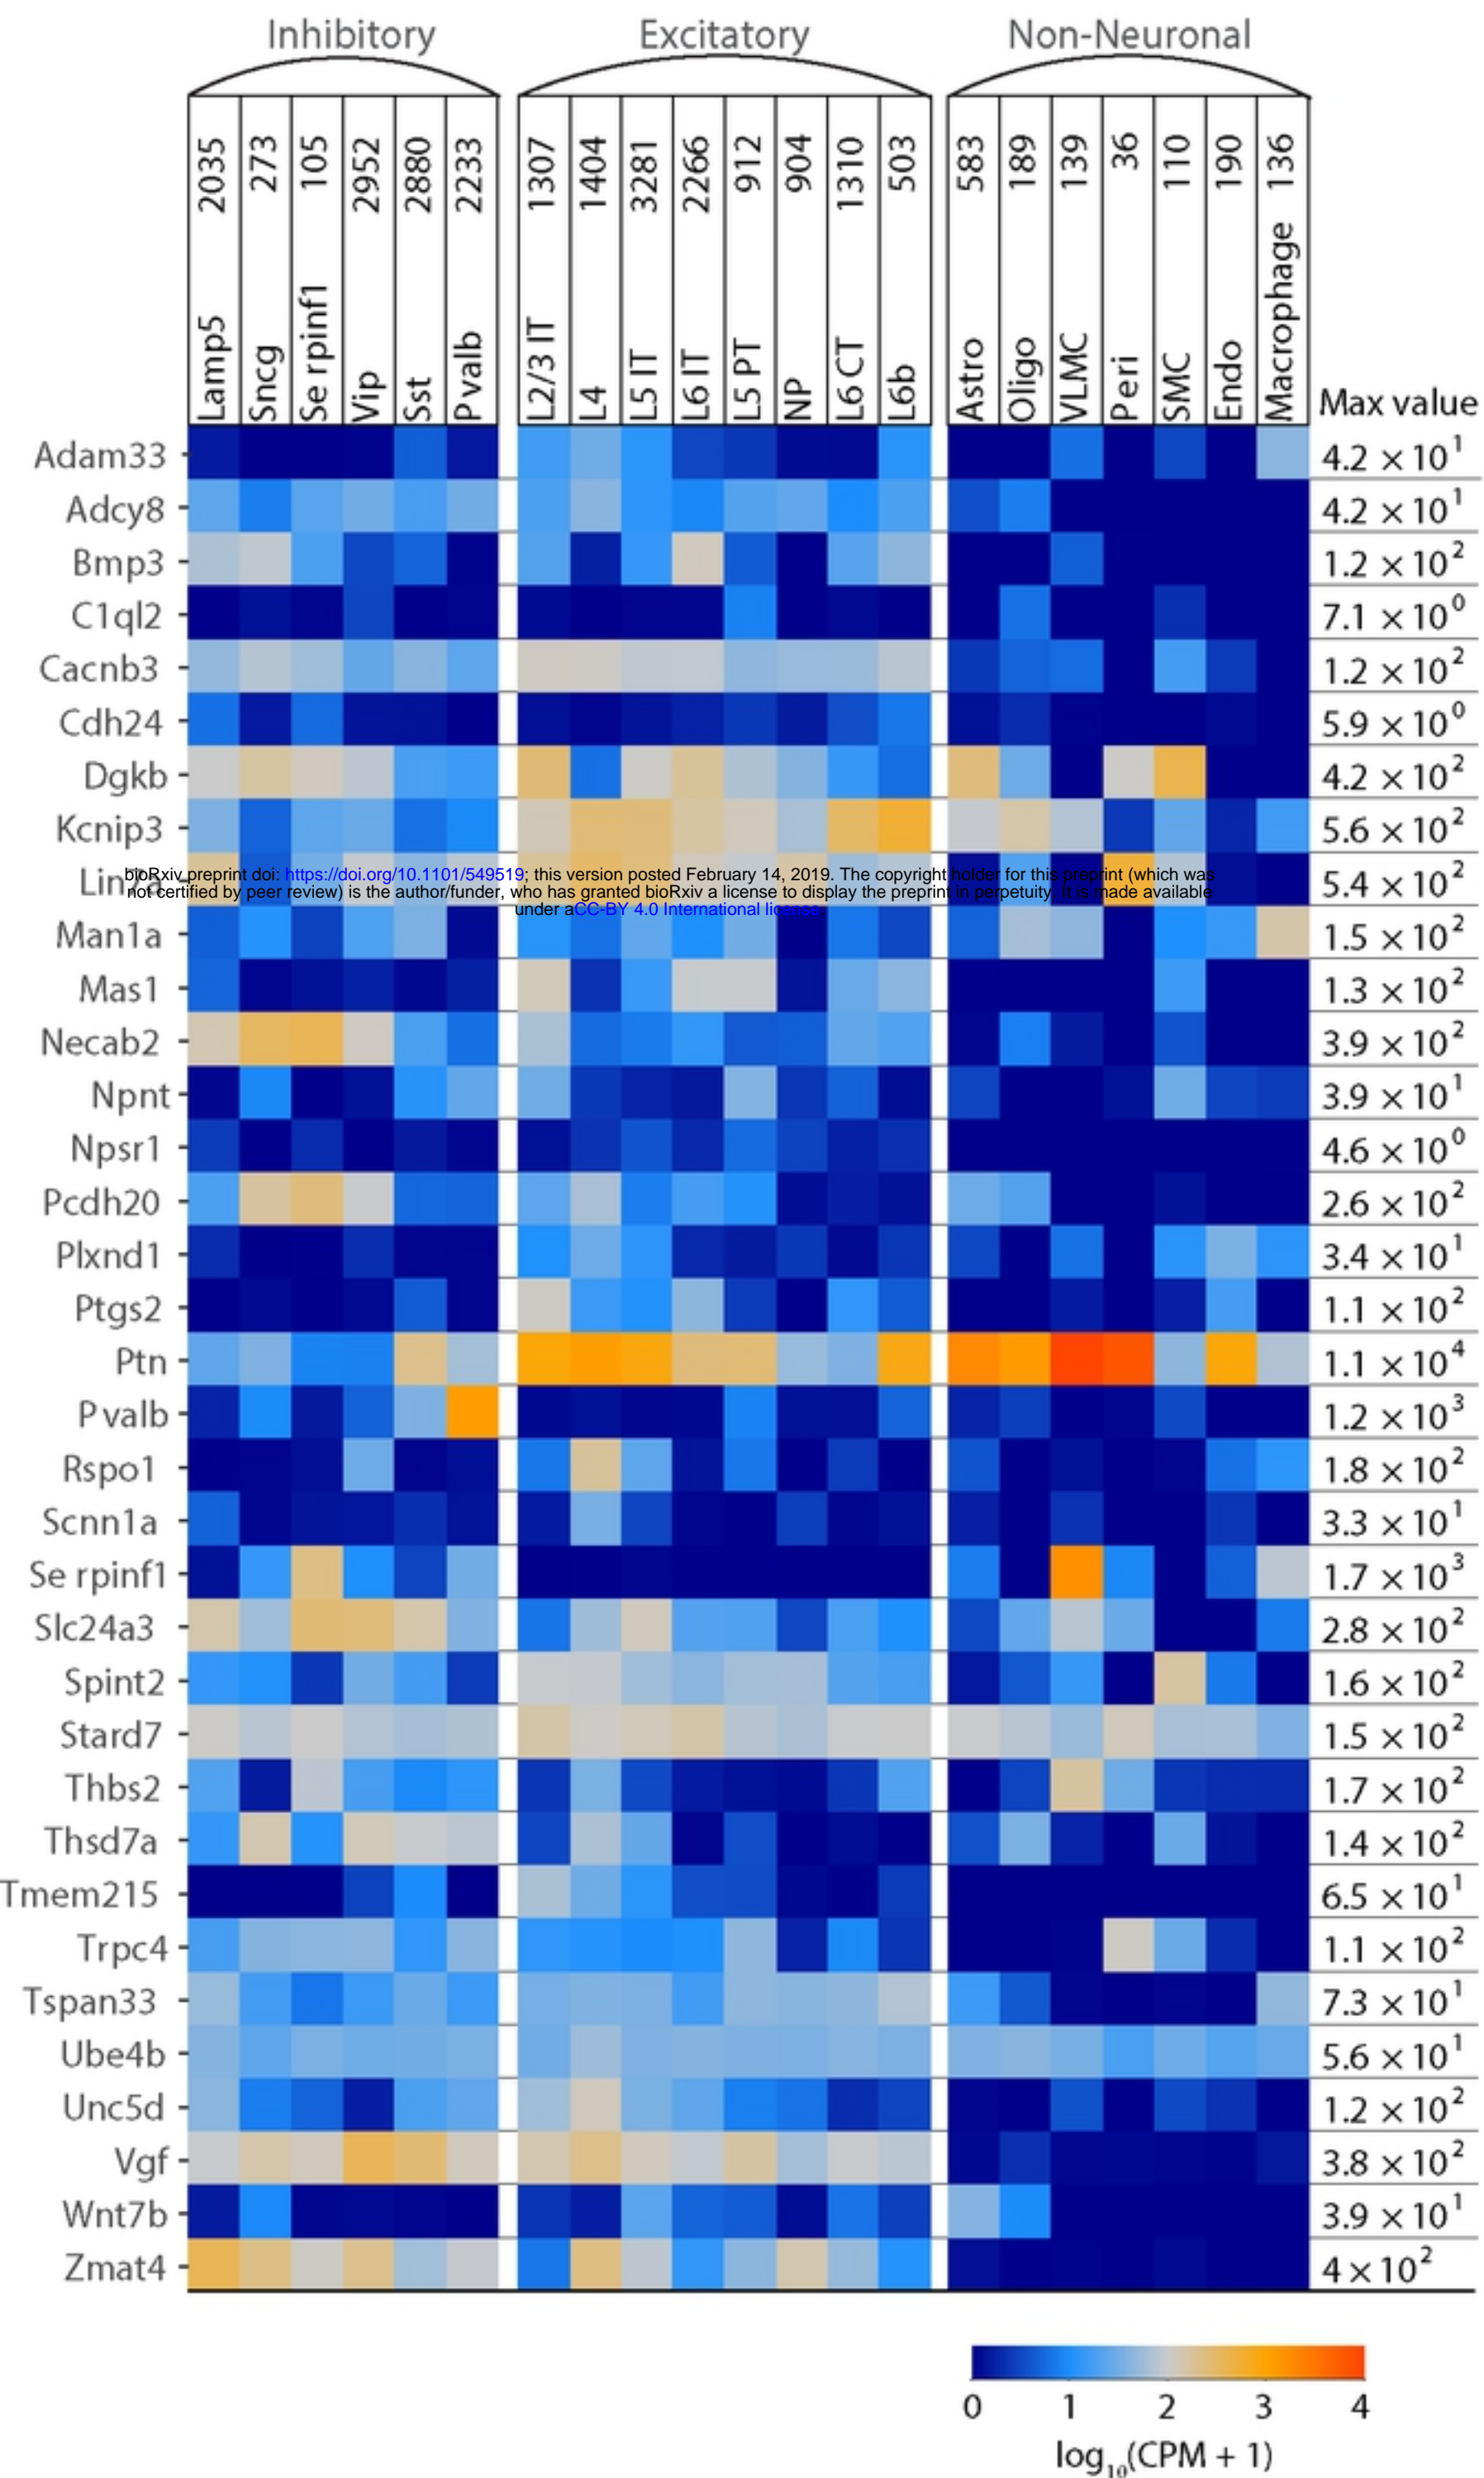

Figure 4



figure 2

doi: <https://doi.org/10.1101/549519>; this version posted February 14, 2019. The copyright holder for this preprint (which was not certified by peer review) is the author/funder, who has granted bioRxiv a license to display the preprint in perpetuity. It is made available under aCC-BY 4.0 International license.

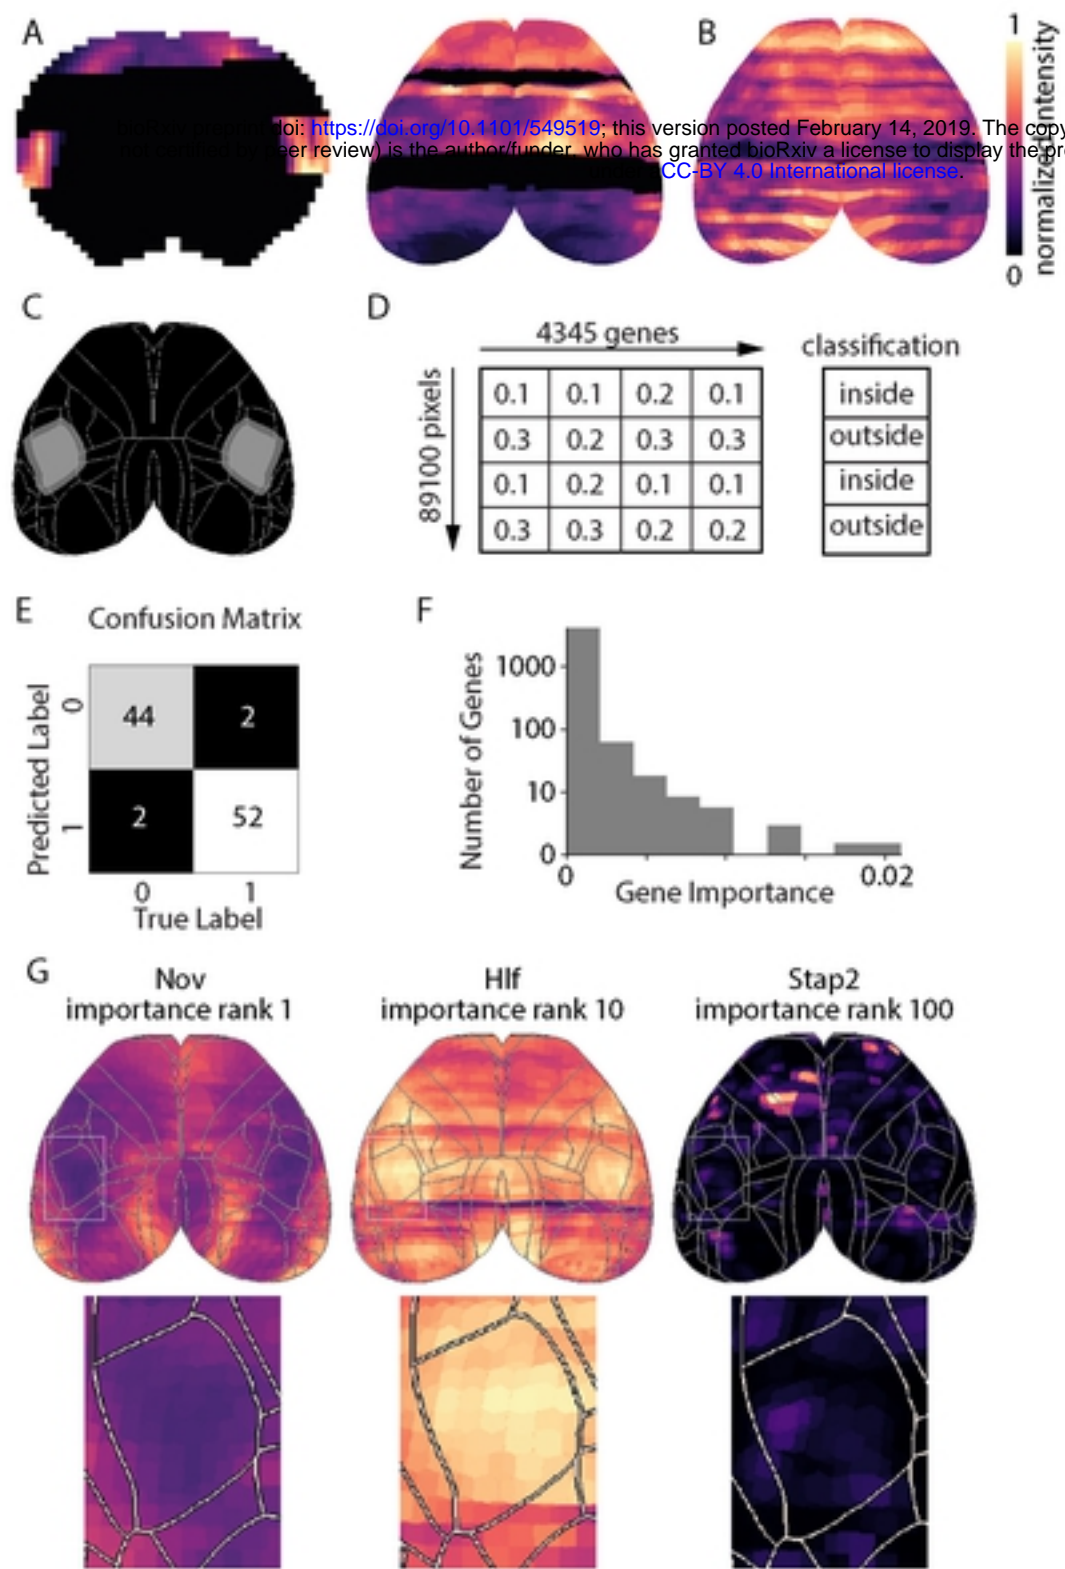

Figure 2

figure 3

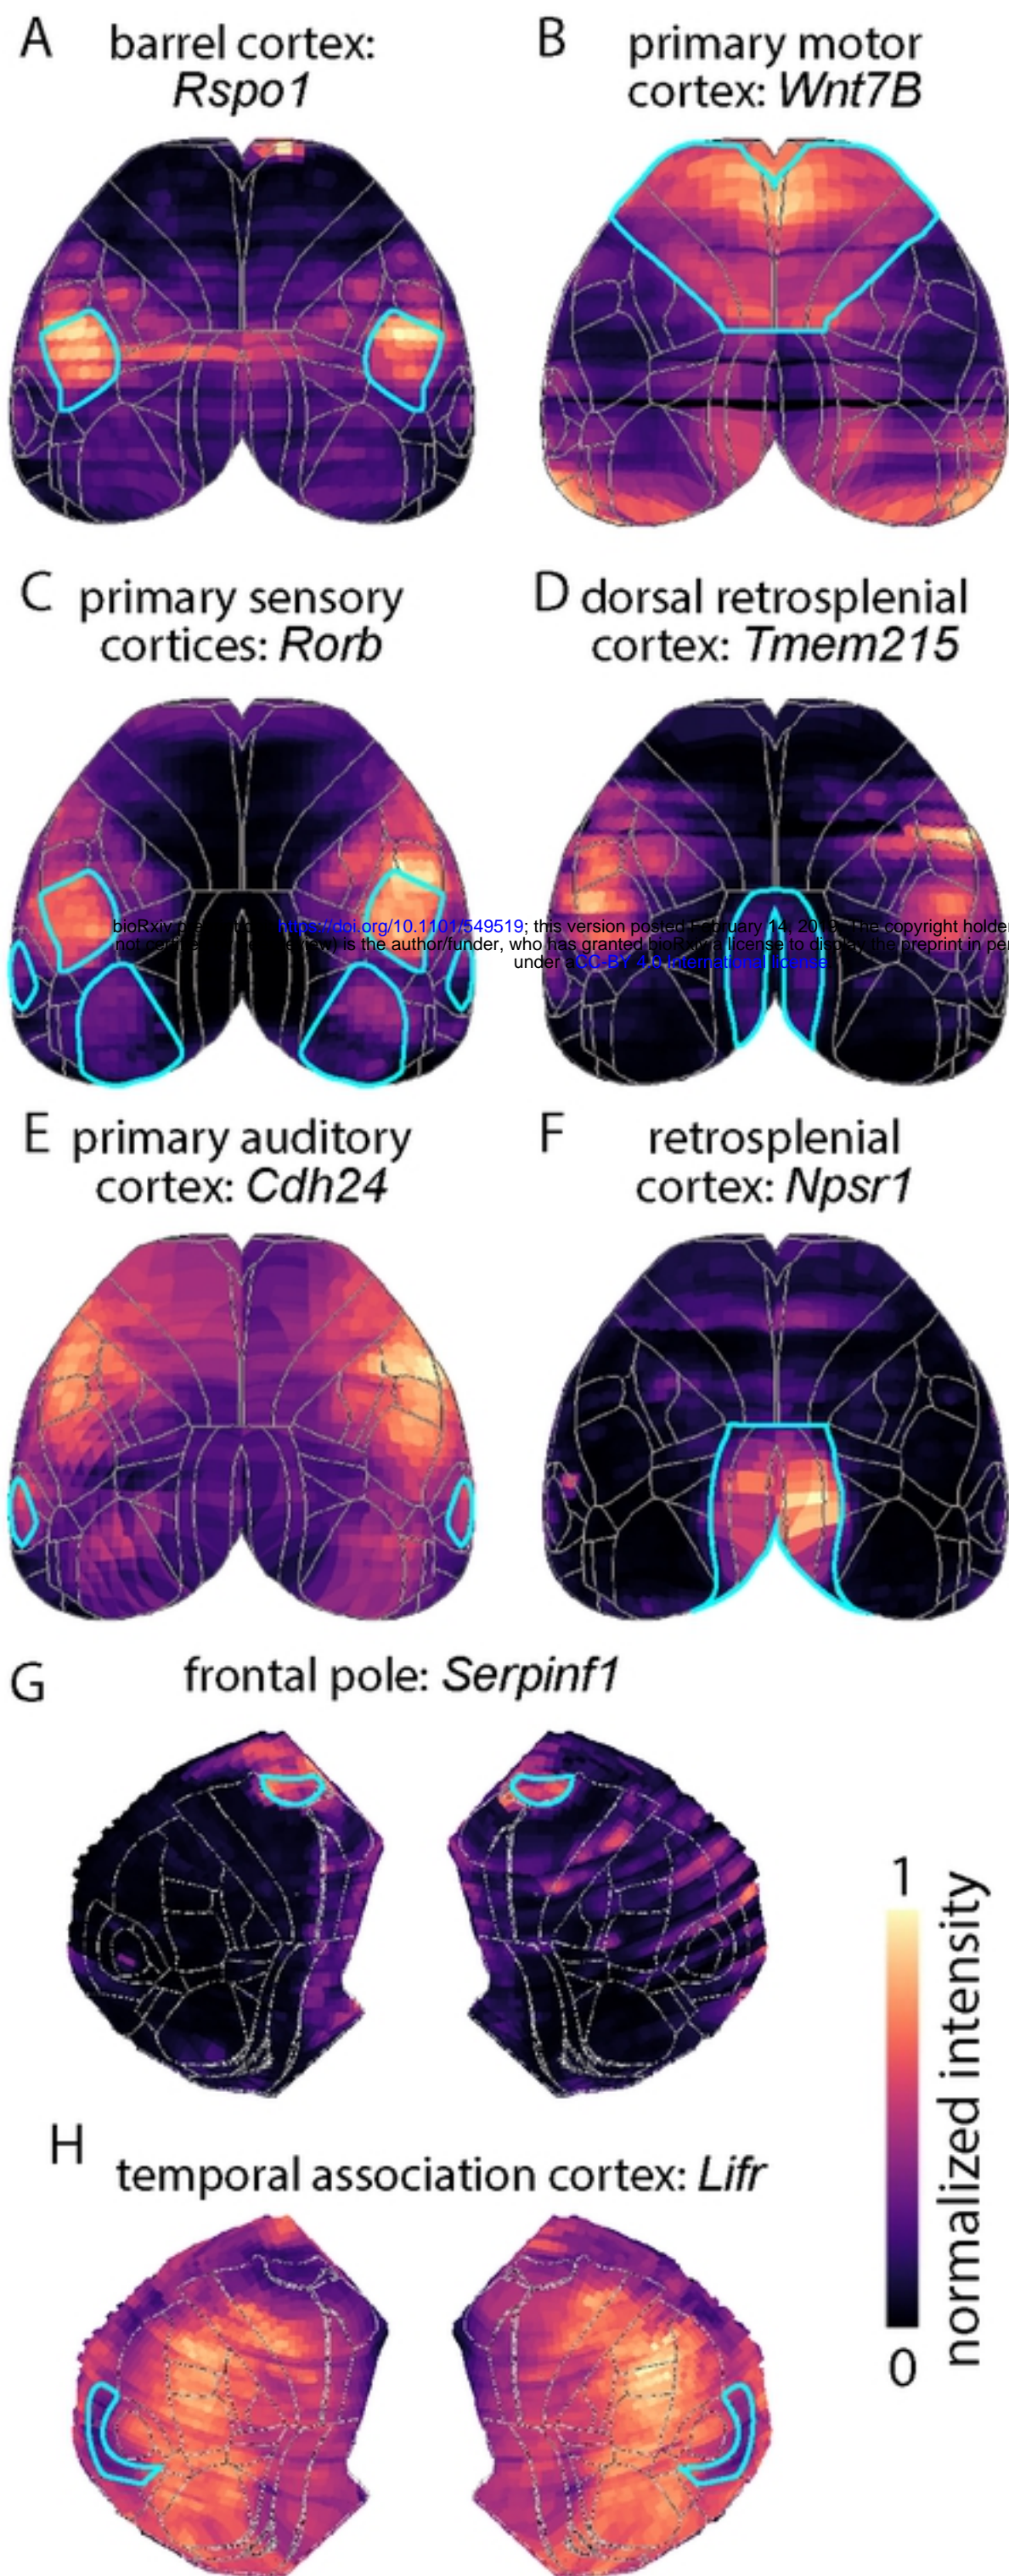

Figure 3



Table 1

| <b>Cortical Region</b> | <b>Potential Genetic Markers</b>                      |
|------------------------|-------------------------------------------------------|
| Somatomotor            | <i>Ube4b, Lin7a, Man1a, Wnt7b</i>                     |
| - Primary              |                                                       |
| - Secondary            |                                                       |
| Somatosensory          | <i>Adam33, Vgf, Kcnip3, Rorb, Pcdh20</i>              |
| - Primary              | <i>Pvalb</i>                                          |
| -- Primary, barrel     | <i>Rspo1</i>                                          |
| -- Primary, nose       |                                                       |
| -- Primary, l. limb    |                                                       |
| -- Primary, mouth      |                                                       |
| -- Primary, u. limb    |                                                       |
| -- Primary, trunk      | <i>Trpc4</i>                                          |
| -- Primary, unassigned |                                                       |
| Auditory               | <i>Vspan5, *Coch</i>                                  |
| - Primary*             | <i>Unc5d, Zmat4, Rspo1, Cdh24, *Ptn, *Chn2</i>        |
| - Dorsal*              | <i>Dgkb</i>                                           |
| - Posterior*           |                                                       |
| - Ventral*             |                                                       |
| Visual                 | <i>Ptgs2</i>                                          |
| - Primary              | <i>Slc24a3, Thbs2</i>                                 |
| - Lateral              |                                                       |
| - Anterolateral        |                                                       |
| - Anteromedial         | <i>Stard7</i>                                         |
| - Posterolateral       |                                                       |
| - Posteromedial        |                                                       |
| - Postrhinal           | <i>Bmp3, Plxnd1, Spint2</i>                           |
| - Laterointermediate   |                                                       |
| - Rostrolateral        |                                                       |
| Anterior Cingulate     |                                                       |
| - Dorsal               |                                                       |
| Retrosplenial          | <i>Cacnb3, Npsr1, Mas1, C1ql2</i>                     |
| - Lateral agranular    |                                                       |
| - Dorsal*              | <i>Tmem215, Npnt</i>                                  |
| - Ventral*             | <i>Adcy8, Scnn1a, Sm1399, Necab2, Thsd7a, *Dpysl5</i> |
| Temporal Association*  | <i>*Lifr</i>                                          |
| Ectorhinal*            | <i>*Kctd4</i>                                         |
| Medial Orbital*        | <i>*Dtx1</i>                                          |
| Visceral*              |                                                       |
| Prelimbic*             |                                                       |
| Frontal Pole*          | <i>*Serpinf1</i>                                      |

bioRxiv preprint doi: <https://doi.org/10.1101/549519>; this version posted February 14, 2019. The copyright holder for this preprint (which was not certified by peer review) is the author/funder, who has granted bioRxiv a license to display the preprint in perpetuity. It is made available under aCC-BY 4.0 International license.
